# Supplementary material for: Alternatively spliced isoforms reveal a novel type of PTB domain in CCM2 protein
Source: PubMed Central journal article supplement (PMC6825194; doi:10.1038/s41598-019-52386-0), 2019-11-01

**Supplemental information**

*Alternatively spliced isoforms reveal a novel type of PTB domain in CCM2 protein*

Xiaoting Jiang, Akhil Padarti, Yanchun Qu, Shen Sheng, Johnathan Abou-Fadel, Ahmed

Badr, Jun Zhang\*

Suppl. Table 1. **Primers for the identification and amplification of various CCM2 isoforms.** The primers are listed in three groups, RACE primers, nested primers, and full-length CCM2 amplification primers. The sequence, direction, and intragenic location of each primer are also listed.

Suppl. Table 2. **Primers for the quantitative PCR (qPCR) for the detection of differentially expressed CCM2 isoforms.** The primer pairs starting exon1 and spanning into other downstream exon (exon 2, 3, etc.) junctions were used for detecting A group isoforms; primer pairs starting exon1A and spanning into other following exon (exon2, 3, etc.) junctions for detecting B group isoforms, respectively. The sequence, qPCR product size, potentially covered isoform(s) and optimized annealing temperature of each primer pair are listed. The primer sets A-100 (spanning exon1-exon2 junction and within exon 2) and B200 (spanning exon1A-exon2 junction and within exon 2) represent a collection of comparable isoforms from A and B group, respectively; while the primer sets A-102 (spanning exon1-exon3 junction and exon4-exon7) and B210 (spanning exon1A-exon3 junction and exon4-exon7) for distinguishing a specific pair of isoforms (CCM2-102, CCM2-210). Allele-specific primer sets for V5 tag and neomycin were used for isoform-specific qPCR.

Suppl. Table 3. **The length and distribution of functional domains along the protein structure of the representative isoforms of CCM2.** Total 9 distinct functional domains were identified by search NCBI CDD database. The phosphotyrosine-binding domain (PTB, or phosphotyrosine interaction - PI domain) is listed first due to its interaction with

NPXY motif of CCM1 and  $\beta$ 1 integrin cytoplasmic tail. Besides PTB domain, there are additional 8 functional domains: DUF1722 (unknown function) that is partially overlapped with reported LD motif and global domain predicted in this report (Fig. 3D) in the middle of CCM2; SSL2 (DNA or RNA helicase); N5-glutamine S-adenosyl-L-methionine-dependent methyltransferase (both protein methyltransferase and tRNA (guanine-N7-)-methyltransferase activities with ATPase activity); GATase1-like (glutamine metabolic process); tbpA (transmembrane movement); excinuclease ABC subunit A (DNA mismatch repair process); flagellar hook-associated protein L (cellular ciliary or flagellar motility), and PRK07168 (bifunctional uroporphyrinogen-III methyltransferase and/or uroporphyrinogen-III synthase activity). PTB, DUF1722 and SSL2 domains are most abundant domains among all CCM2 isoforms. aa -- amino acid residues. \*CCM2-100 isoform is originally reported as canonical CCM2 protein with ten- coding exons.

**Suppl. Table 4. Identification of essential cores of atypical PTB domain in CCM2.**

The sequence of exon 6 along with newly identified adjacent exon 6A and exon 6B of CCM2 are compared. Neither their sequences nor their tertiary structure (Fig) share any similarity to the PTB domain in CCM2, by comparing exons with PTB domain; while exon 6 and exon 6A were defined by their specific interaction with various NPXY motifs in cytoplasmic domains of representative  $\beta$ -integrins and CCM1. The LD-like sequence within exon 6 is underlined/Latinized (consensus: LDxLLxxL, Red colored letter: present identical to LD-like sequence; Green colored letter present conserved amino acids to LD-like sequence), which does not share any notable homologs or similarities to the sequence

of exon 6A of CCM2, but share highly similar tertiary structure (Fig. 7).

Suppl. Fig. 1. **Relative expression profiling of endogenous CCM2 isoforms in brain tissues and cell lines by qPCR.** The expression levels of CCM2 isoforms ( $2^{-\Delta\text{CT}}$ ) were presented with bar plots, while  $\beta$ -actin was taken as an inference gene. qPCR primer set information for CCM2 isoforms was provided in Suppl. Table 2. A). For Brain tissues: CB, Cerebellum; CC, Cerebral Cortex; CR, Corpus Callosum; DM, Dura Matter; FL, Frontal Lobe; HC, Hippocampus; IS, Insula; MO, Medulla Oblongata; NA, Nucleus Accumbens; OP, Occipital Pole; PG, Paracentral Gyrus; PL, Parietal Lobe; PN, Pons; SC, Spinal Cord; SN, Substantia Nigra; TL, Temporal Lobe. B). For endothelial cell lines: HU, HUVEC; HA, HAEC; HE, HMVEC. For cancer cell lines: MD, MDA231; K5, K562; L6, HL60; U9, U937; C3, PC-3; J1, RAJ1; JU, JURKAT; 29, 293T; LA, HELA.

Suppl. Fig. 2. **Differentiated cellular compartmentations among different CCM2 isoforms in various cell lines.** Each CCM2 isoform was transiently transfected and images show the subcellular localization of CCM2 isoforms with /without treatment of leptomycin. Cell lines: A. Hela cells, B. HUVEC cells, C. HMVEC cells; and D, hCMEC/D3 cells.

Suppl. Fig. 3. **Original digital images at a lower exposure of Western blots in Figures 3 and 6.** Protein lysates were separated by SDS-PAGE using Criterion Precast gels (Bio-Rad), specifically TGX gels for Fig. 3, 4-15% Tris-HCL gels for Fig. 6A and 16.5% Tris-Tricine gels for Fig. 6B and 6C. In Fig. 6B and 6C, all target proteins were tagged with

epitopes and labeled with radioactive with  $S^{35}$ .

Suppl. Table 1

| PRIMER                 | SEQUENCE                       | DIRECTION | LOCATION             |
|------------------------|--------------------------------|-----------|----------------------|
| <b>RACE primers:</b>   |                                |           |                      |
| MGC41F                 | CTCTGTACCTTCTCATGGGTTTCTT      | FORWARD   | intra-exon:2         |
| MGC42F                 | CAGGCTTCTTGCCCTTCTTGCC         | FORWARD   | inter-exon:1-2       |
| MGC-6A-F1              | AGCCACGTGACCTCTTCCACAGTCA      | FORWARD   | intra-exon:6A        |
| MGC-6A-F2              | TTCTTTGACTGTCAGCTTCTCT         | FORWARD   | intra-exon:6A        |
| MGC-6A-R1              | AAATAGGGAGATGACCCCTGGA         | REVERSE   | intra-exon:6A        |
| MGC-6A-R2              | TTTGGGTGGGCTCAATGTGATT         | REVERSE   | intra-exon:6A        |
| MGC5 RACE-3            | GGGAGATGACCCCTGGAGAATTTGGGTG   | REVERSE   | intra-exon:6A        |
| MGC5 RACE-1            | GCCCAGCGCCTCAATGTGCTGCTGATG    | REVERSE   | intra-exon:10        |
| MGC5 RACE-2            | CGAAGTGCTGGCTGTCTTCTCAGGG      | REVERSE   | intra-exon:10        |
| MGC5 RACE-4            | GGAGGGATTGAGTATCTGGTATGGACG    | REVERSE   | intra-exon:3         |
| MGC5 RACE-5            | CTCAGCTACTCAGGAGGCTGAGGC       | REVERSE   | intra-exon:2B        |
| MGC5 RACE-6            | CGAAGGGTGGAAACACGCGACAAGGC     | REVERSE   | intra-exon:1B        |
| MGC5 RACE-7            | CACACCTGCAGTGCCTTGGGATC        | REVERSE   | intra-exon:1D        |
| MGC5 RACE-8            | CTAGCTGCATTCTCCATGCAAAACATTGAG | REVERSE   | intra-exon:1C        |
| MGC5 RACE-10           | GGAGAGATTCTGGTTCTCCTCTGCCG     | REVERSE   | intra-exon:1A        |
| MGC200-F2              | CAGAGGGAGGGCTAACATCTGGCCATA    | FORWARD   | intra-exon:1A        |
| MGC5 RACE-11           | GCTCAGCAGTCTGTCTGGCTCAGCGC     | REVERSE   | intra-exon:2         |
| <b>Nested primers:</b> |                                |           |                      |
| MGC1A-R1               | TCATTCTCCATGGAATACCCGTGTG      | REVERSE   | intra-exon:1A        |
| MGC1A-R2               | TTCTCTCTGCCGACAGCTACTATGCAT    | REVERSE   | intra-exon:1A        |
| MGC1B-F1               | CATGAGTCTGGAGGCAGGTAGAGGC      | FORWARD   | intra-exon:1B        |
| MGC1B-F2               | CACCTGGGAATGGAGTTATCTCT        | FORWARD   | intra-exon:1B        |
| MGC1B-R1               | GTTTGCAATGCTTGTCTAAAGGCAG      | REVERSE   | intra-exon:1B        |
| MGC1B-R2               | AGATAACTCCATTCCCAGGTGGGGCTT    | REVERSE   | intra-exon:1B        |
| MGC1C-F1               | CTTTTTAGCAGCTTCTCCAGAGT        | FORWARD   | intra-exon:1C        |
| MGC1C-F2               | ATGTTTTGCATGGAGAATGCAGC        | FORWARD   | intra-exon:1C        |
| MGC1D-F1               | CTGTTTCTGGAGTCCACATCT          | FORWARD   | intra-exon:1D        |
| MGC1D-F2               | GGATGATCCTCGTTTTGCTGGGAGTA     | FORWARD   | intra-exon:1D        |
| MGC1D-R1               | TCACACCTGCAGTGCCTTGGGATCT      | REVERSE   | intra-exon:1D        |
| MGC1D-R2               | CTACTCCAGCAAAACGAGGATCATCC     | REVERSE   | intra-exon:1D        |
| MGC1E-F1               | TTTGCCCTGAAGAAGTGAGCTTG        | FORWARD   | intra-exon:1B        |
| MGC1E-F2               | ATGAGTCTGGAGGCAGGTAGAG         | FORWARD   | intra-exon:1B        |
| MGC1E-R1               | TGCAGTCTGTCTCAAAGGCAGCAAGAT    | REVERSE   | intra-exon:1B        |
| MGC1E-R2               | CTCTACCTGCTCCAGGACTCATGAGT     | REVERSE   | intra-exon:1B        |
| MGC2B-F1               | ATGGAGTTTTGCTCTTGTGCCCCA       | FORWARD   | intra-exon:2B        |
| MGC2B-F2               | CAGTCTTGGCTCACCACAACCTC        | FORWARD   | intra-exon:2B        |
| MGC223-F1              | ATGCAAAAGCTGCTTCCCTGAATC       | FORWARD   | inter-exon:3-8       |
| MGC142-F1              | ATGCTGACGCTGCGCACCAAGCTGTCA    | FORWARD   | inter-exon:8-9       |
| MGC-EX6A-F1            | CCAGCCACGTGACCTTTCCA           | FORWARD   | intra-exon:6A        |
| MGC-EX4-F1             | AGAGCCACCAGCTTCCGGGA           | FORWARD   | intra-exon:4         |
| MGC-EX7-F1             | ATGACTCTTCTACAAAAGTGGA         | FORWARD   | intra-exon:7         |
| MGC-EX6-R1             | CGCTGTGCAGGGACAGGTGGT          | REVERSE   | intra-exon:6         |
| MGC-EX4-R1             | CTGTCTCAGGACCACCAGGTGT         | REVERSE   | intra-exon:4         |
| MGC-EX2-R1             | CTTTACCTCTTCTCAATATAGT         | REVERSE   | intra-exon:2         |
| <b>Full-length:</b>    |                                |           |                      |
| MGCF1                  | ATGGAAGAGGAGGGCAAGAA           | FORWARD   | CCM2-A (Start codon) |
| MGCR1                  | GCTGAGTCTGGTCCATGCT            | REVERSE   | HUMAN MGC            |
| MGCR2                  | TGCTGAGTCTGGTCCAT              | REVERSE   | HUMAN MGC            |
| MGCR3                  | TGCTGAGTCTGGTCCATGCT           | REVERSE   | HUMAN MGC            |
| MGCF-001               | ATGCATAGTAGCTGTCCGCAGA         | FORWARD   | CCM2-B (Start codon) |
| MGC200-F1              | ATGCATAGTAGTGTCCGCAGAGGAGGA    | FORWARD   | CCM2-B (Start codon) |

Suppl. Table 2

| RT-PCR Code  | Primer                                        | Sequence                                                    | Product Size (bp) | Representig Isoform(s)                                         | Anneling Temp (C) |
|--------------|-----------------------------------------------|-------------------------------------------------------------|-------------------|----------------------------------------------------------------|-------------------|
| <b>A-100</b> | MGC-EXB1-2-F1<br><b>MGC-EX2-R1</b>            | GGCAAGAAGCCTGGAATTGT<br>CGCCTCTCTGTACACCTTCTC               | <b>98</b>         | <b>100, 103, 104,115, 116, 117<br/>118, 119, 402, 404, 602</b> | <b>65</b>         |
| <b>A-101</b> | MGC-EXB1-3-F1<br>MGC-EXB3-4-R1                | GGGCAAGAAGTATTTAGGTCAG<br>GTGGGCTCTCTTTGCATTGT              | <b>103</b>        | <b>101, 102, 120, 401, 601, 603</b>                            | <b>60</b>         |
| <b>A-102</b> | MGC-EXB1-3-F1<br>MGC-EXB4-7-R1                | GGGCAAGAAGTATTTAGGTCAG<br>GTAGAAGAGTCATCTGTCTTCAGGA         | <b>291</b>        | <b>102</b>                                                     | <b>65</b>         |
| <b>B-213</b> | MGC-EXB2-3-F1<br>MGC-EXB4-7-R1                | GGAGGTAAAGTATTTAGGTCAG<br>GTAGAAGAGTCATCTGTCTTCAGGA         | <b>291</b>        | <b>117, 203, 404</b>                                           | <b>65</b>         |
| <b>A-117</b> | MGC-EXB4-7-R1<br><b>MGC-EX4-F3</b>            | GTAGAAGAGTCATCTGTCTTCAGGA<br>TCAGCCTGTCTGCGTACAAC           | <b>148</b>        | <b>102, 117, 203, 404, 210</b>                                 | <b>60</b>         |
| <b>B-204</b> | MGC-EXB1A-2-F1<br>MGC-EXB2-4-R1               | GGAGAATGAGCCTGGAATTG<br>GTGGGCTCTCTTTACCTCCTT               | <b>193</b>        | <b>204</b>                                                     | <b>60</b>         |
| <b>B-209</b> | MGC-EXB1A-8-F1<br><b>MGC-EX9-R1</b>           | GAGAATGAGCTGCTTCCCTGA<br>CCTGTGATGACAGCTTGGTG               | <b>146</b>        | <b>209</b>                                                     | <b>65</b>         |
| <b>B-210</b> | MGC-EXB1A-3-F1<br>MGC-EXB4-7-R1               | GGAGAATGAGTATTTAGGTCAG<br>GTAGAAGAGTCATCTGTCTTCAGGA         | <b>291</b>        | <b>210</b>                                                     | <b>55</b>         |
| <b>B-213</b> | MGC-EXB6-7as01-F1<br>MGC-EX10as04-R1          | TGCACAGCGATGACTCTTCT<br>GCCAAAGCTGTCAAGTATGA                | <b>89</b>         | <b>213</b>                                                     | <b>60</b>         |
| <b>A-401</b> | MGC-EXB1-3-F1<br>MGC-EXB-4as01-10as01-R1      | GGGCAAGAAGTATTTAGGTCAG<br>ATGTGGTGCTCCTGAGTCAA              | <b>138</b>        | <b>401</b>                                                     | <b>60</b>         |
| <b>A-116</b> | MGC-EXB1-2-F1<br>MGC-EXB2-6-R2                | GGCAAGAAGCCTGGAATTGT<br>CGCAGCGACCTTTACCTCCTT               | <b>193</b>        | <b>116</b>                                                     | <b>60</b>         |
| <b>B-200</b> | MGC-EXB1A-2-F1<br><b>MGC-EX2-R2</b>           | GGAGAATGAGCCTGGAATTG<br>AACACCACAGTGTGCAGAGG                | <b>120</b>        | <b>200, 203, 204, 206<br/>207, 208,213, 216,</b>               | <b>65</b>         |
| <b>B-201</b> | MGC-EXB3-4-R1<br>MGC-EXB1A-3-F2               | GTGGGCTCTCTTTGCATTGT<br>CCATGGAGAATGAGTATTTAGGTCAG          | <b>103</b>        | <b>201, 202, 210, 214</b>                                      | <b>60</b>         |
| <b>A-402</b> | MGC-EXB3-4as02-F2<br>MGC-EXB4as02-10as02-R2   | CAAAGAGAGCCCACCAGCTT<br>CTCATCCCCGTCCCTCCA                  | <b>104</b>        | <b>402</b>                                                     | <b>65</b>         |
| <b>A-404</b> | MGC-EXB9-10as04-F2<br>MGC-EXB10as04-10as05-R2 | GTTCTGCTGCTTGGTCTGA<br>CCATCATGGCCAATGGTCT                  | <b>87</b>         | <b>404</b>                                                     | <b>65</b>         |
| <b>AB-6A</b> | MGC-EXB6A-7-F2<br><b>MGC-EX8-R2</b>           | CTCCCTATTTCAAGATGACTCTTCTAC<br>ACCACCCACATCCACAGATT         | <b>103</b>        | <b>EX6A</b>                                                    | <b>60</b>         |
| <b>CCM3</b>  | PDCD102F1<br>PDCD101R2                        | ATGAGGATGACAATGGAAGAGATGAAG<br>GGTCTTGGAATTCTGGCTCTGGTCGTTT | <b>307</b>        | <b>PDCD10</b>                                                  | <b>65</b>         |
| <b>V5</b>    | EX10V5-F1<br>EX10V5-R1                        | CCAGCACTTCGAGAACTTCC<br>ATCTGCAGAAATGCCCTTtg                | <b>265</b>        | <b>V5</b>                                                      | <b>65</b>         |
| <b>Neo</b>   | Neo-F1<br>Neo-R1                              | CTGAATGAACTGCAGGACGA<br>ATACTTTCTCGGCAGGAGCA                | <b>172</b>        | <b>Neo</b>                                                     | <b>65</b>         |

Suppl. Table 3

| Isoform identifier | Length (aa) | PTB domain          | Domain-2                                                               | Domain-3                                     | Domain-4                                             |
|--------------------|-------------|---------------------|------------------------------------------------------------------------|----------------------------------------------|------------------------------------------------------|
| CCM2-100*          | 444         | 61-221: PTB (161aa) | 244-361:Protein of unknown function (DUF1722) (118 aa)                 | SSL2: DNA or RNA helicases of superfamily II |                                                      |
| CCM2-101           | 386         | 1-163:PTB (162aa)   | 186-303:Protein of unknown function (DUF1722) (118 aa)                 | SSL2: DNA or RNA helicases of superfamily II |                                                      |
| CCM2-102           | 295         | 1-143:PTB (143aa)   | 95-212:Protein of unknown function (DUF1722) (118 aa)                  | SSL2: DNA or RNA helicases of superfamily II |                                                      |
| CCM2-107           | 251         | NO PTB              | 51-168:Protein of unknown function (DUF1722) (118 aa)                  | SSL2: DNA or RNA helicases of superfamily II |                                                      |
| CCM2-109           | 142         | NO PTB              | 1-59:Protein of unknown function (DUF1722) (59 aa)                     | SSL2: DNA or RNA helicases of superfamily II | Excinuclease ABC subunit A                           |
| CCM2-116           | 309         | NO PTB              | 1-59:Protein of unknown function (DUF1722) (59 aa)                     | SSL2: DNA or RNA helicases of superfamily II | Flagellar hook-associated protein L                  |
| CCM2-117           | 353         | 60-201: PTB (142aa) | 153-270:Protein of unknown function (DUF1722) (118 aa)                 | SSL2: DNA or RNA helicases of superfamily II |                                                      |
| CCM2-402           | 153         | NO PTB              | 4-153:N5-glutamine S-adenosyl-L-methionine-dependent methyltransferase |                                              |                                                      |
| CCM2-404           | 334         | 60-201: PTB (142aa) |                                                                        | SSL2: DNA or RNA helicases of superfamily II |                                                      |
| CCM2-600           | 485         | 60-221: PTB (162aa) | 285-402:Protein of unknown function (DUF1722)                          | SSL2: DNA or RNA helicases of superfamily II |                                                      |
| CCM2-601           | 427         | 1-163: PTB (163aa)  | 227-344:Protein of unknown function (DUF1722)                          | SSL2: DNA or RNA helicases of superfamily II |                                                      |
| CCM2-602           | 188         | 60-188: PTB (129aa) | 44-188: Type 1 glutamine amidotransferase (GATase1)-like domain        |                                              |                                                      |
| CCM2-200           | 465         | 81-242: PTB (162aa) | 265-382:Protein of unknown function (DUF1722) (118 aa)                 | SSL2: DNA or RNA helicases of superfamily II |                                                      |
| CCM2-201           | 407         | 22-184: PTB (163aa) | 207-324:Protein of unknown function (DUF1722) (118 aa)                 | SSL2: DNA or RNA helicases of superfamily II | 1-238: Thiamin transporter substrate binding subunit |
| CCM2-203           | 374         | 81-222: PTB (142aa) | 174-291:Protein of unknown function (DUF1722) (118 aa)                 | SSL2: DNA or RNA helicases of superfamily II |                                                      |
| CCM2-204           | 437         | 52-214: PTB (163aa) | 237-354:Protein of unknown function (DUF1722) (118 aa)                 | SSL2: DNA or RNA helicases of superfamily II | 1-187:tRNA pseudouridine synthase C                  |
| CCM2-206           | 506         | 81-242: PTB (162aa) | 306-423:Protein of unknown function (DUF1722) (118 aa)                 | SSL2: DNA or RNA helicases of superfamily II |                                                      |
| CCM2-210           | 316         | 22-164: PTB (143aa) | 116-233:Protein of unknown function (DUF1722) (118 aa)                 | SSL2: DNA or RNA helicases of superfamily II |                                                      |
| CCM2-212           | 272         | NO PTB              | 72-189:Protein of unknown function (DUF1722) (118 aa)                  | SSL2: DNA or RNA helicases of superfamily II |                                                      |
| CCM2-213           | 354         | 81-242: PTB (162aa) | 1-296:tbpA (thiamin transporter substrate binding subunit)(296aa)      |                                              |                                                      |
| CCM2-216           | 415         | 81-242: PTB (162aa) | 215-333:Protein of unknown function (DUF1722) (119 aa)                 | SSL2: DNA or RNA helicases of superfamily II | PRK07168                                             |



**Suppl. Table 4**

| <b>Motif</b>                      | <b>Sequence</b>                                                                                                 | <b>Length<br/>(aa)</b> | <b>Domains</b>                                                     |
|-----------------------------------|-----------------------------------------------------------------------------------------------------------------|------------------------|--------------------------------------------------------------------|
| CCM2-Exon6<br><br><i>Isoform</i>  | <b>VAAEELCCLLGQVFQVVYTE</b> <u><b>STIDFLDRAIFDGASTPTHHLSLHS</b></u><br><br><i>CCM2-107, CCCM2-116, CCM2-212</i> | <b>45</b>              | <b>No putative conserved domain<br/>No relationship with PTB 1</b> |
| CCM2-Exon6A<br><br><i>Isoform</i> | <b>ASHVTSSTVTSSFDCQLPLHFRTLAILSPPKFSRVISLFQ</b><br><br><i>CCM2-600, CCM2-601, CCM2-606, CCM2-607, CCM2-206</i>  | <b>41</b>              | <b>No putative conserved domain<br/>No relationship with PTB 1</b> |
| CCM2-Exon6B<br><br><i>Isoform</i> | <b>DHGQTHGKLLRLPWEASWQWWSSGRWGRMEGTPELSLPAWPTQHFQE</b><br><br><i>CCM2-610</i>                                   | <b>47</b>              | <b>No putative conserved domain<br/>No relationship with PTB 1</b> |

Suppl. Fig. 1A Brain

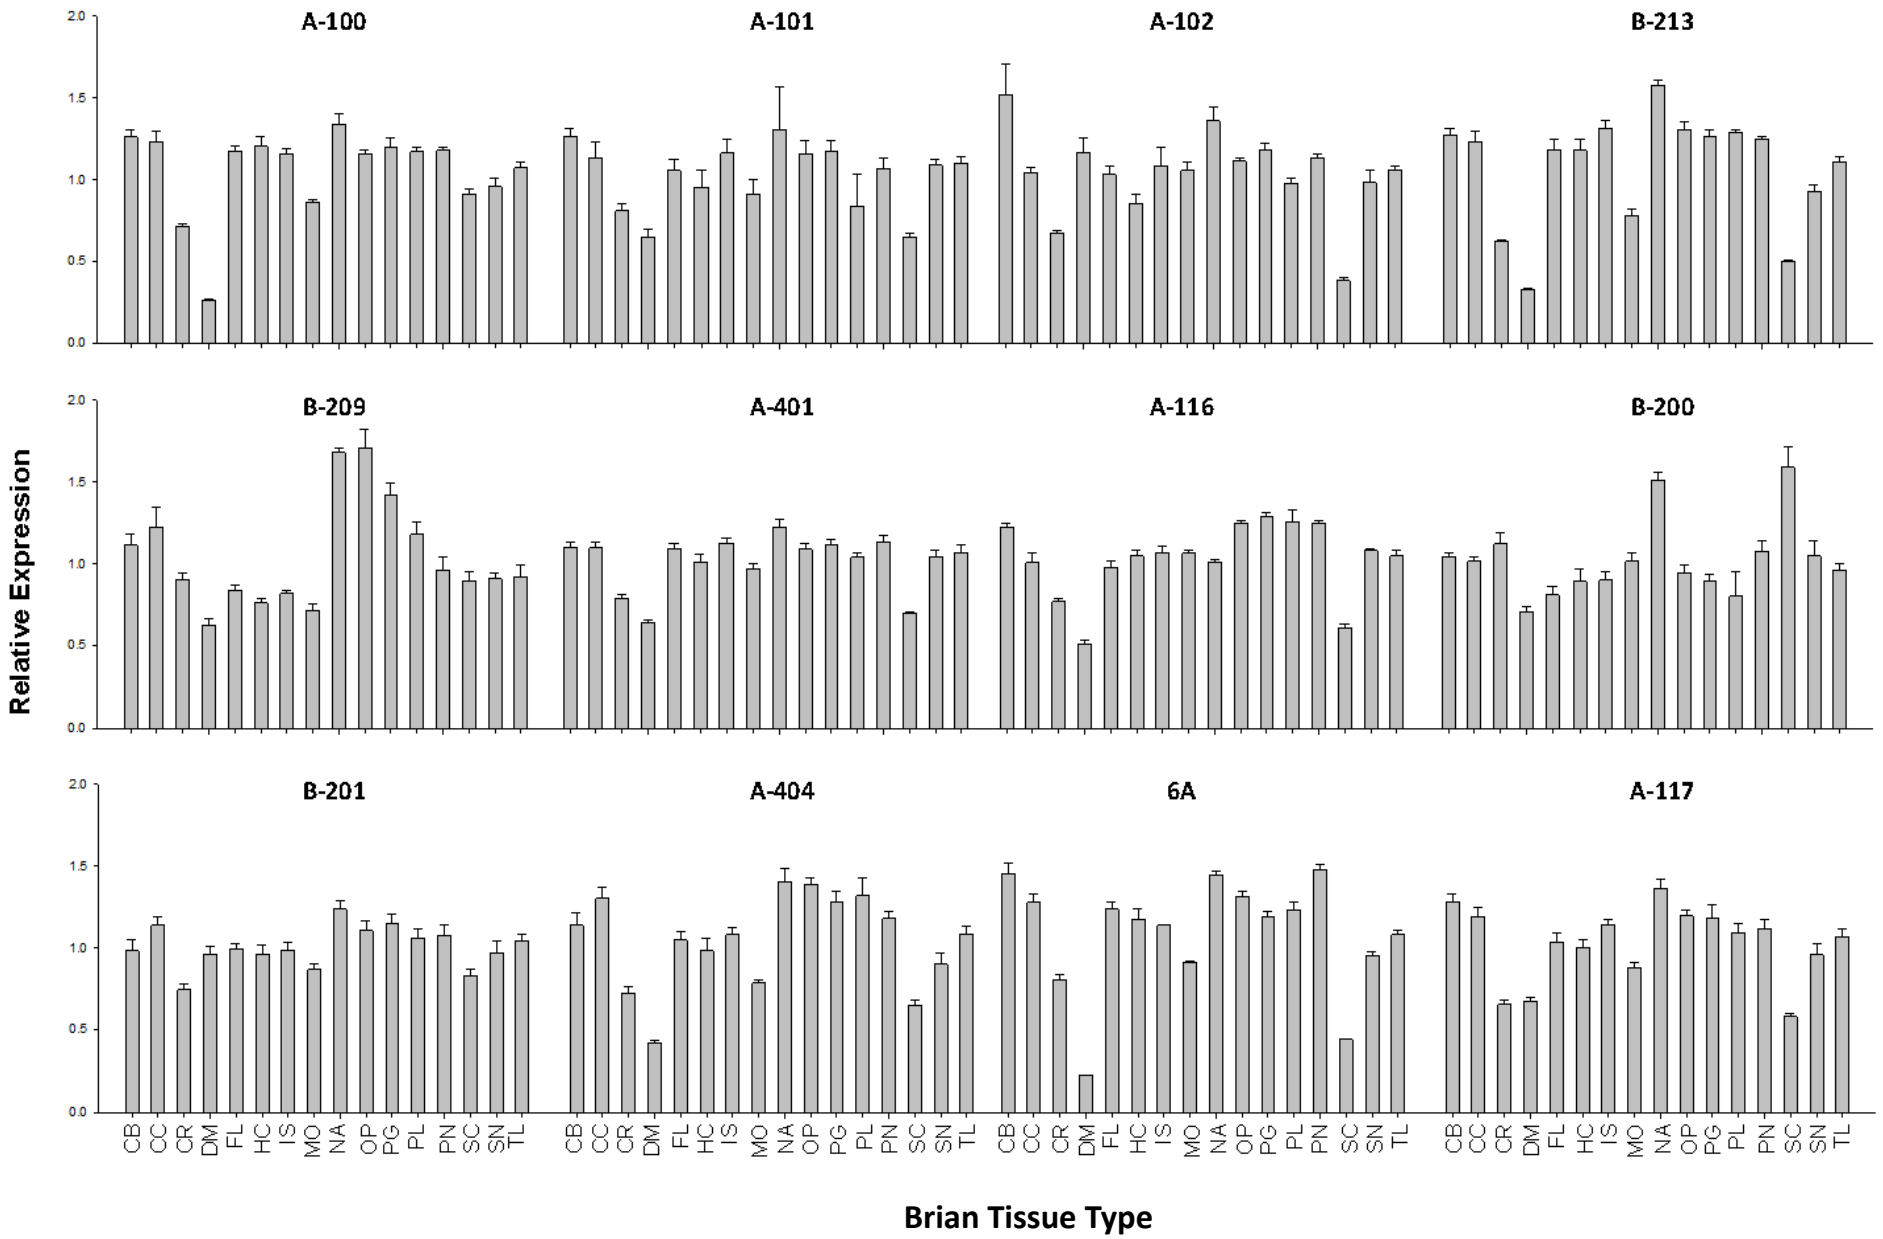

Suppl. Fig. 1B Cell

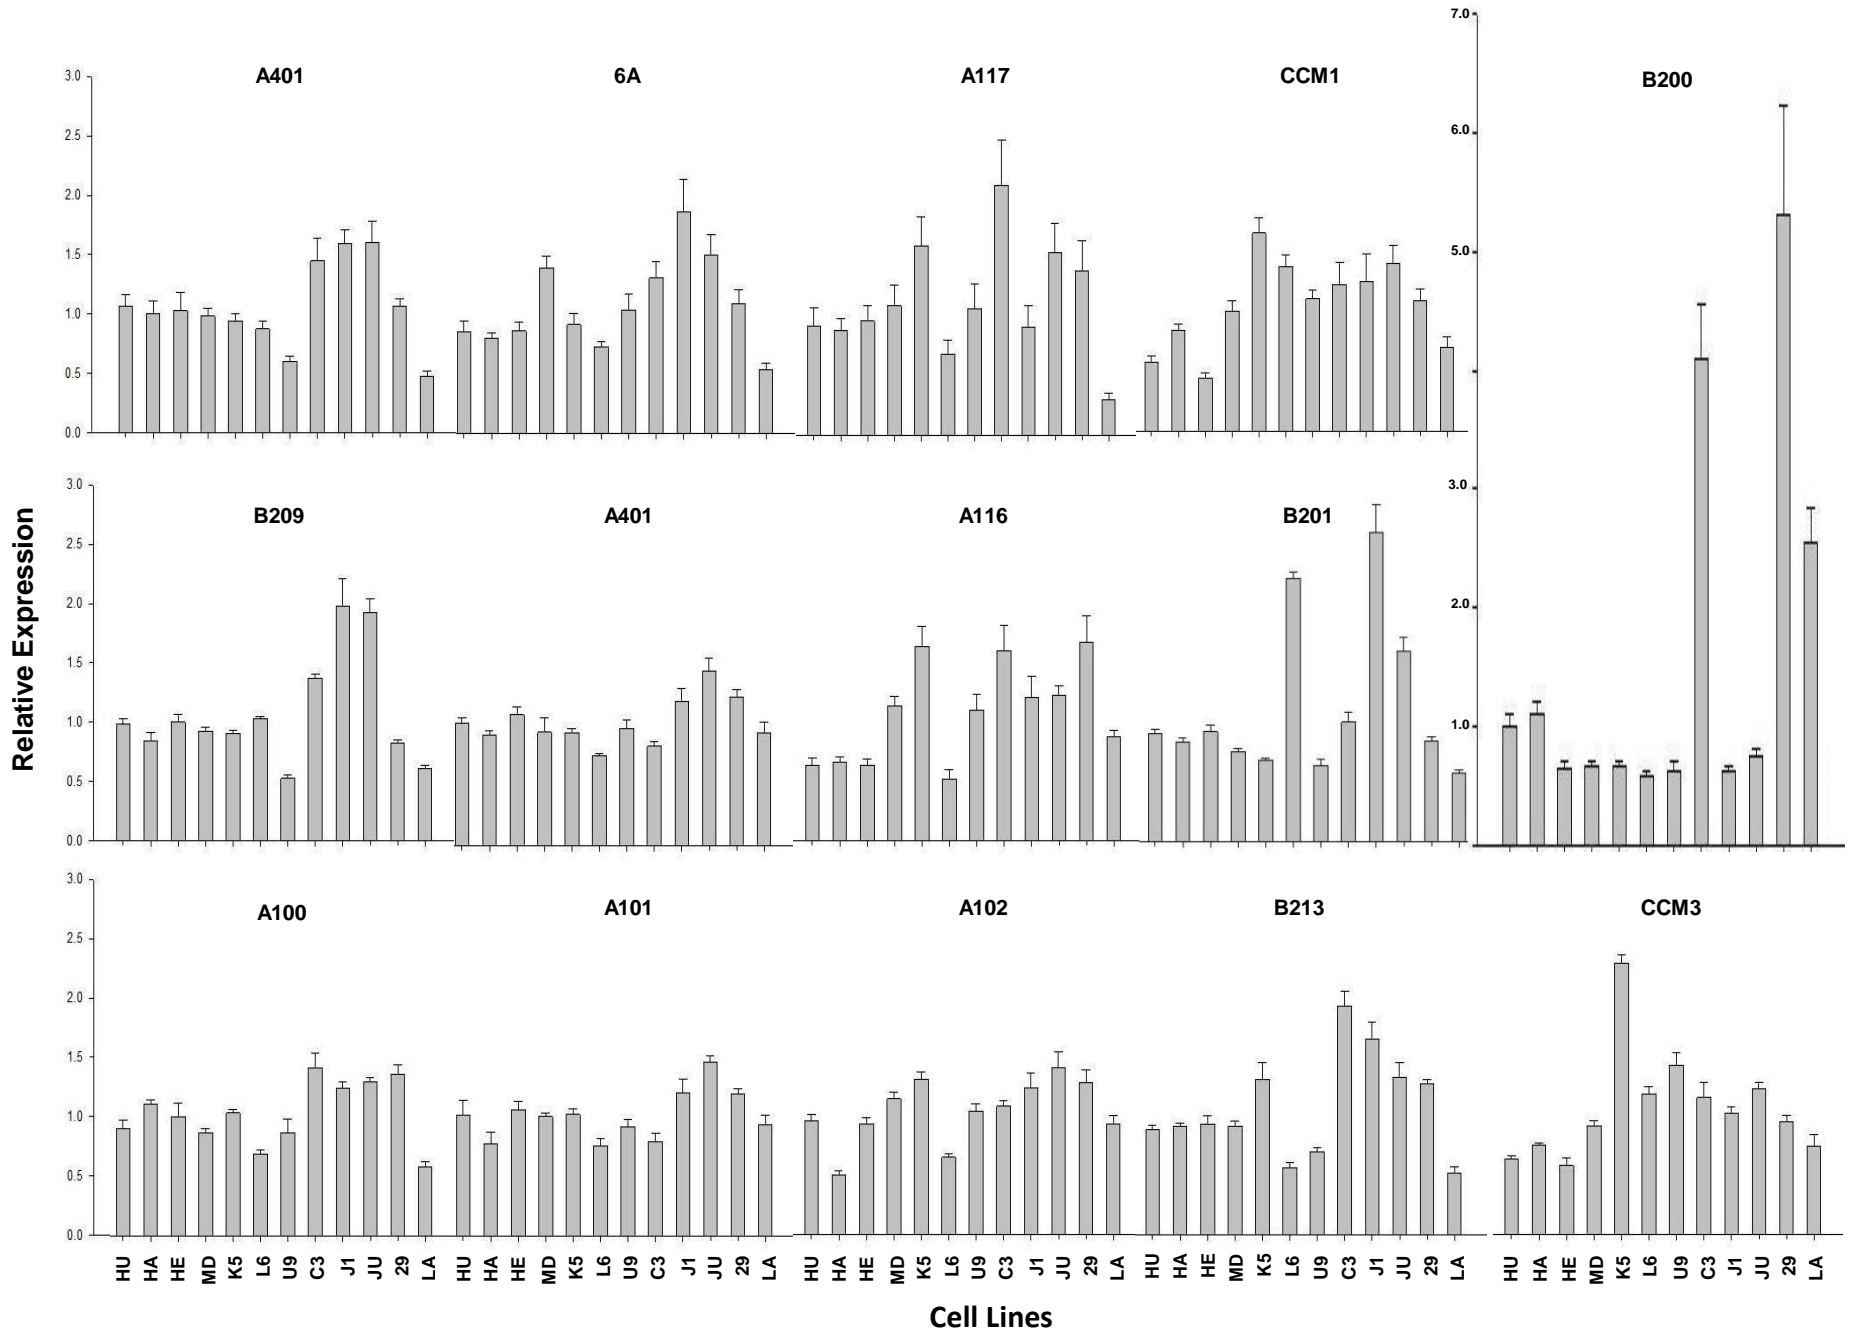

Suppl. Fig. 2A HeLa

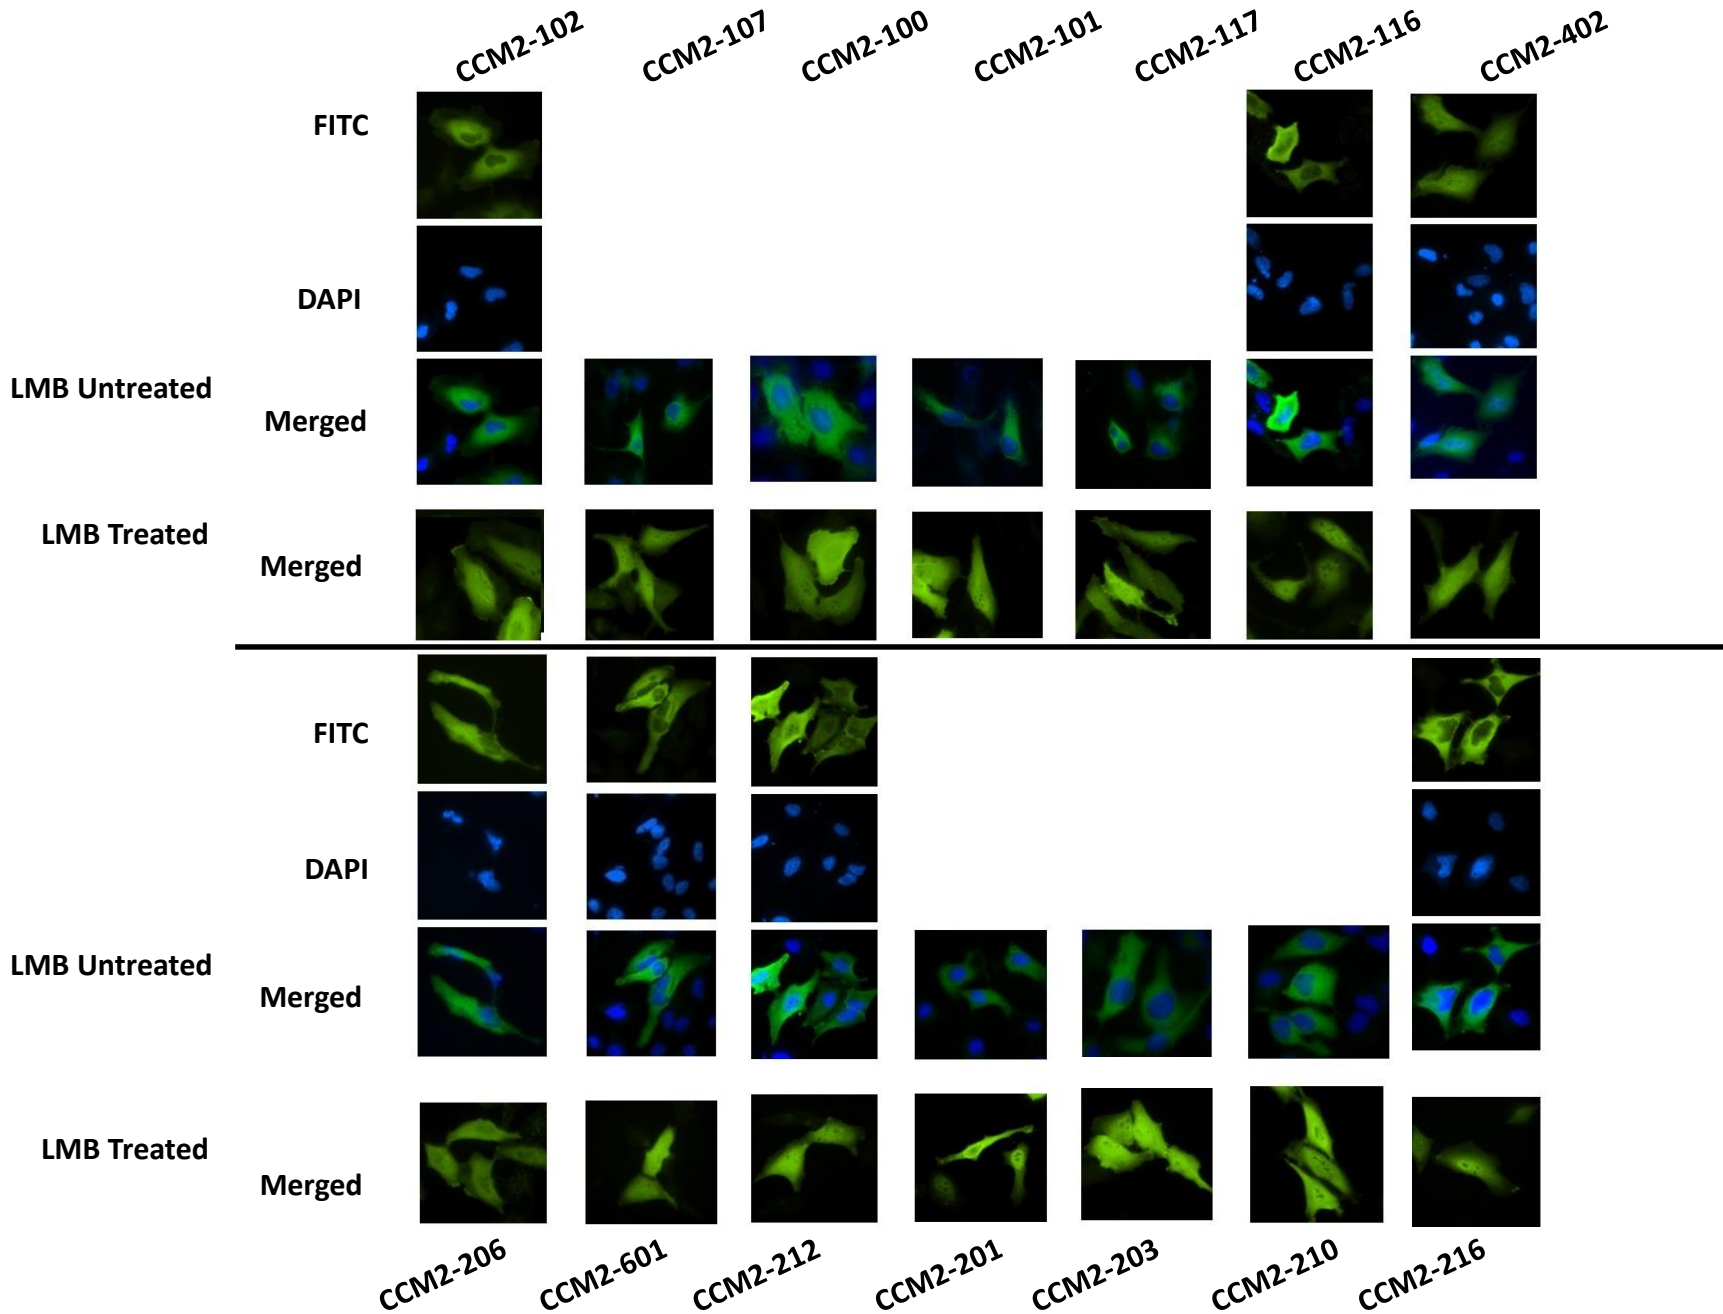

Suppl. Fig. 2B HUVEC

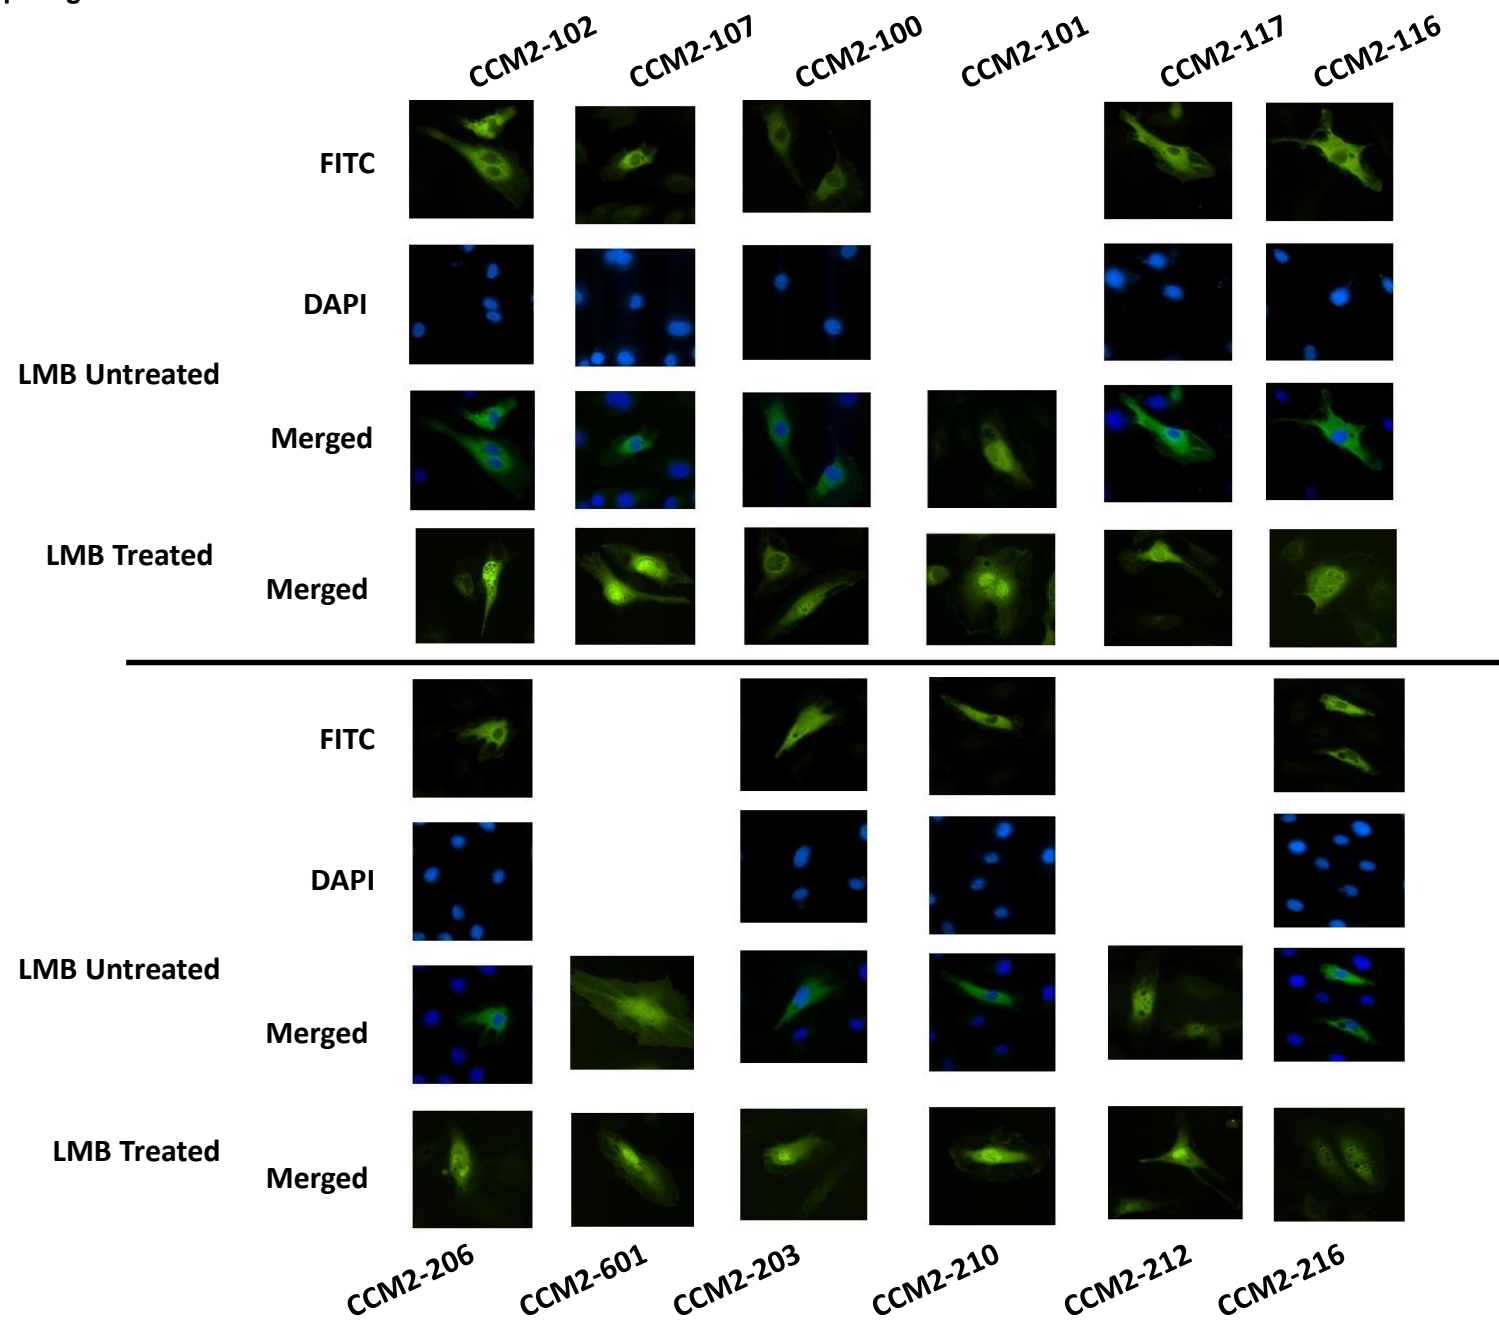

Suppl. Fig. 2C HMVEC

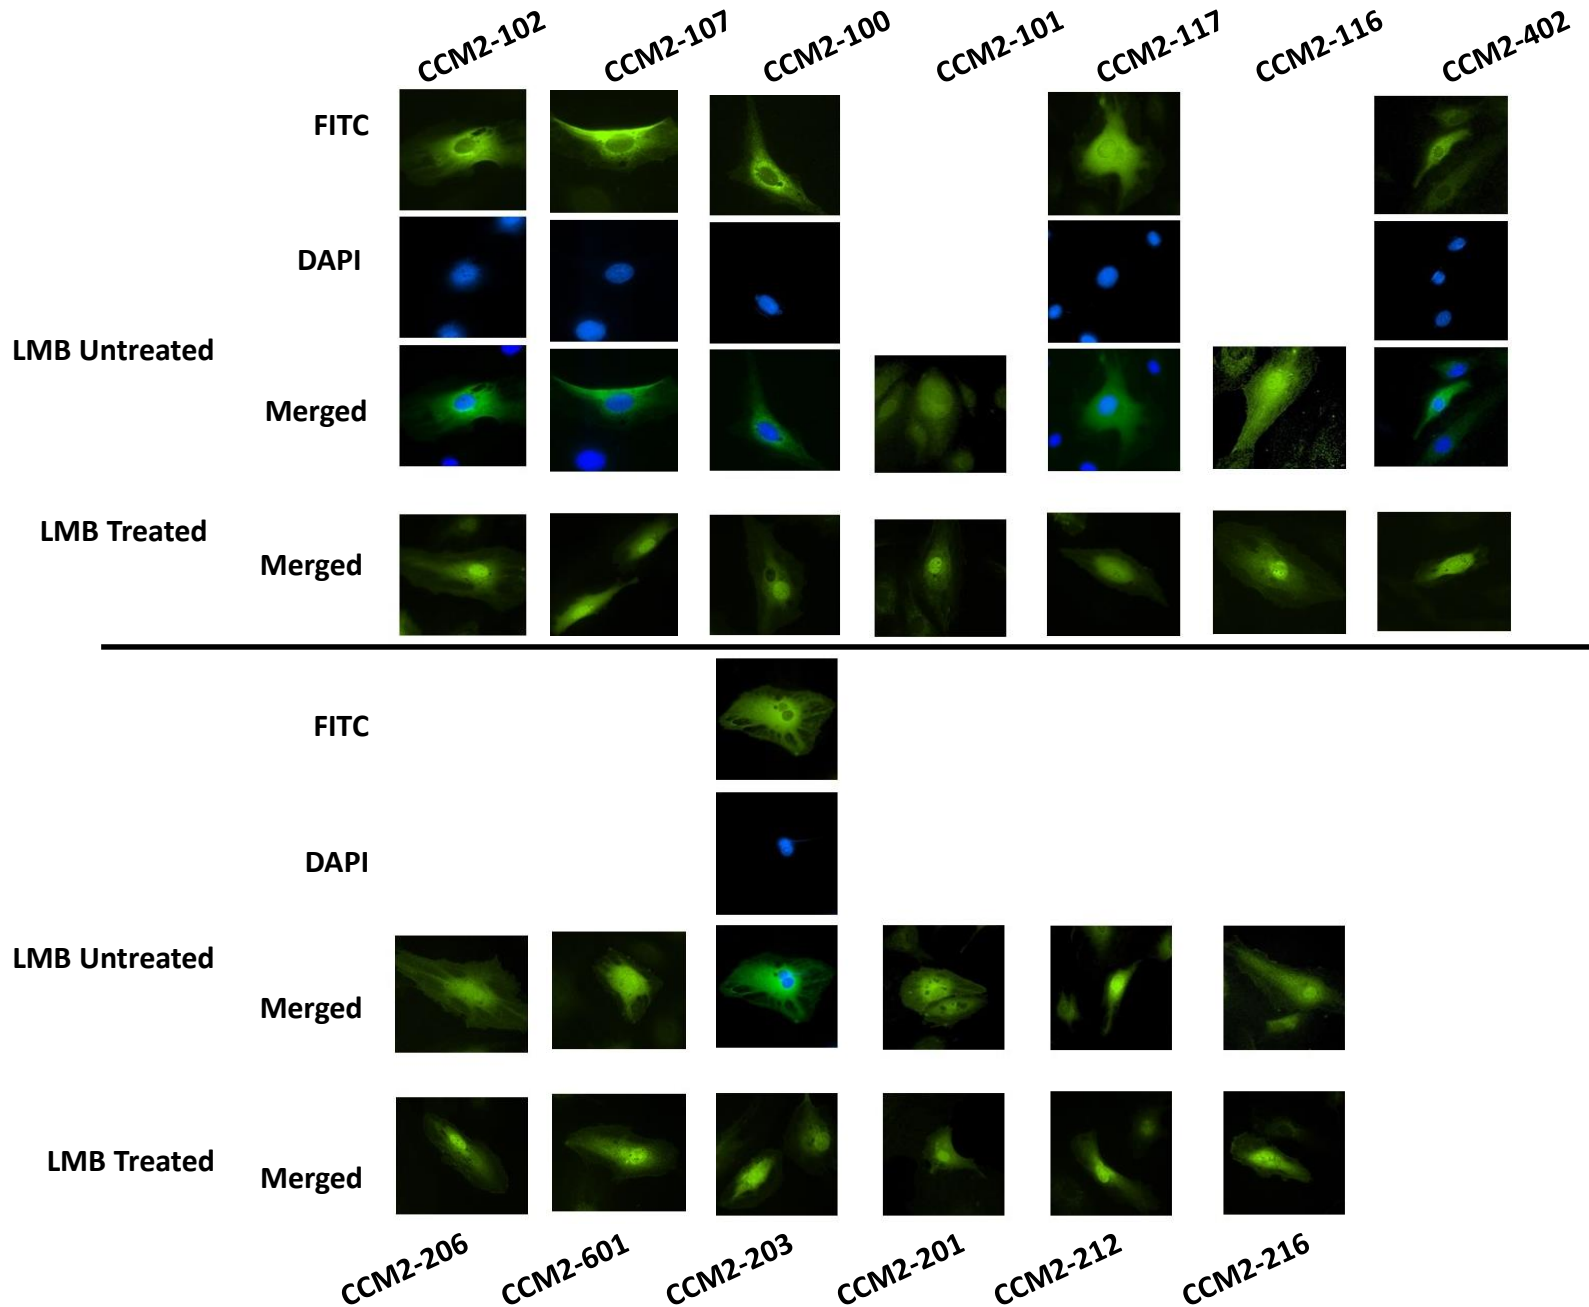

Suppl. Fig. 2D hCMEC/3D

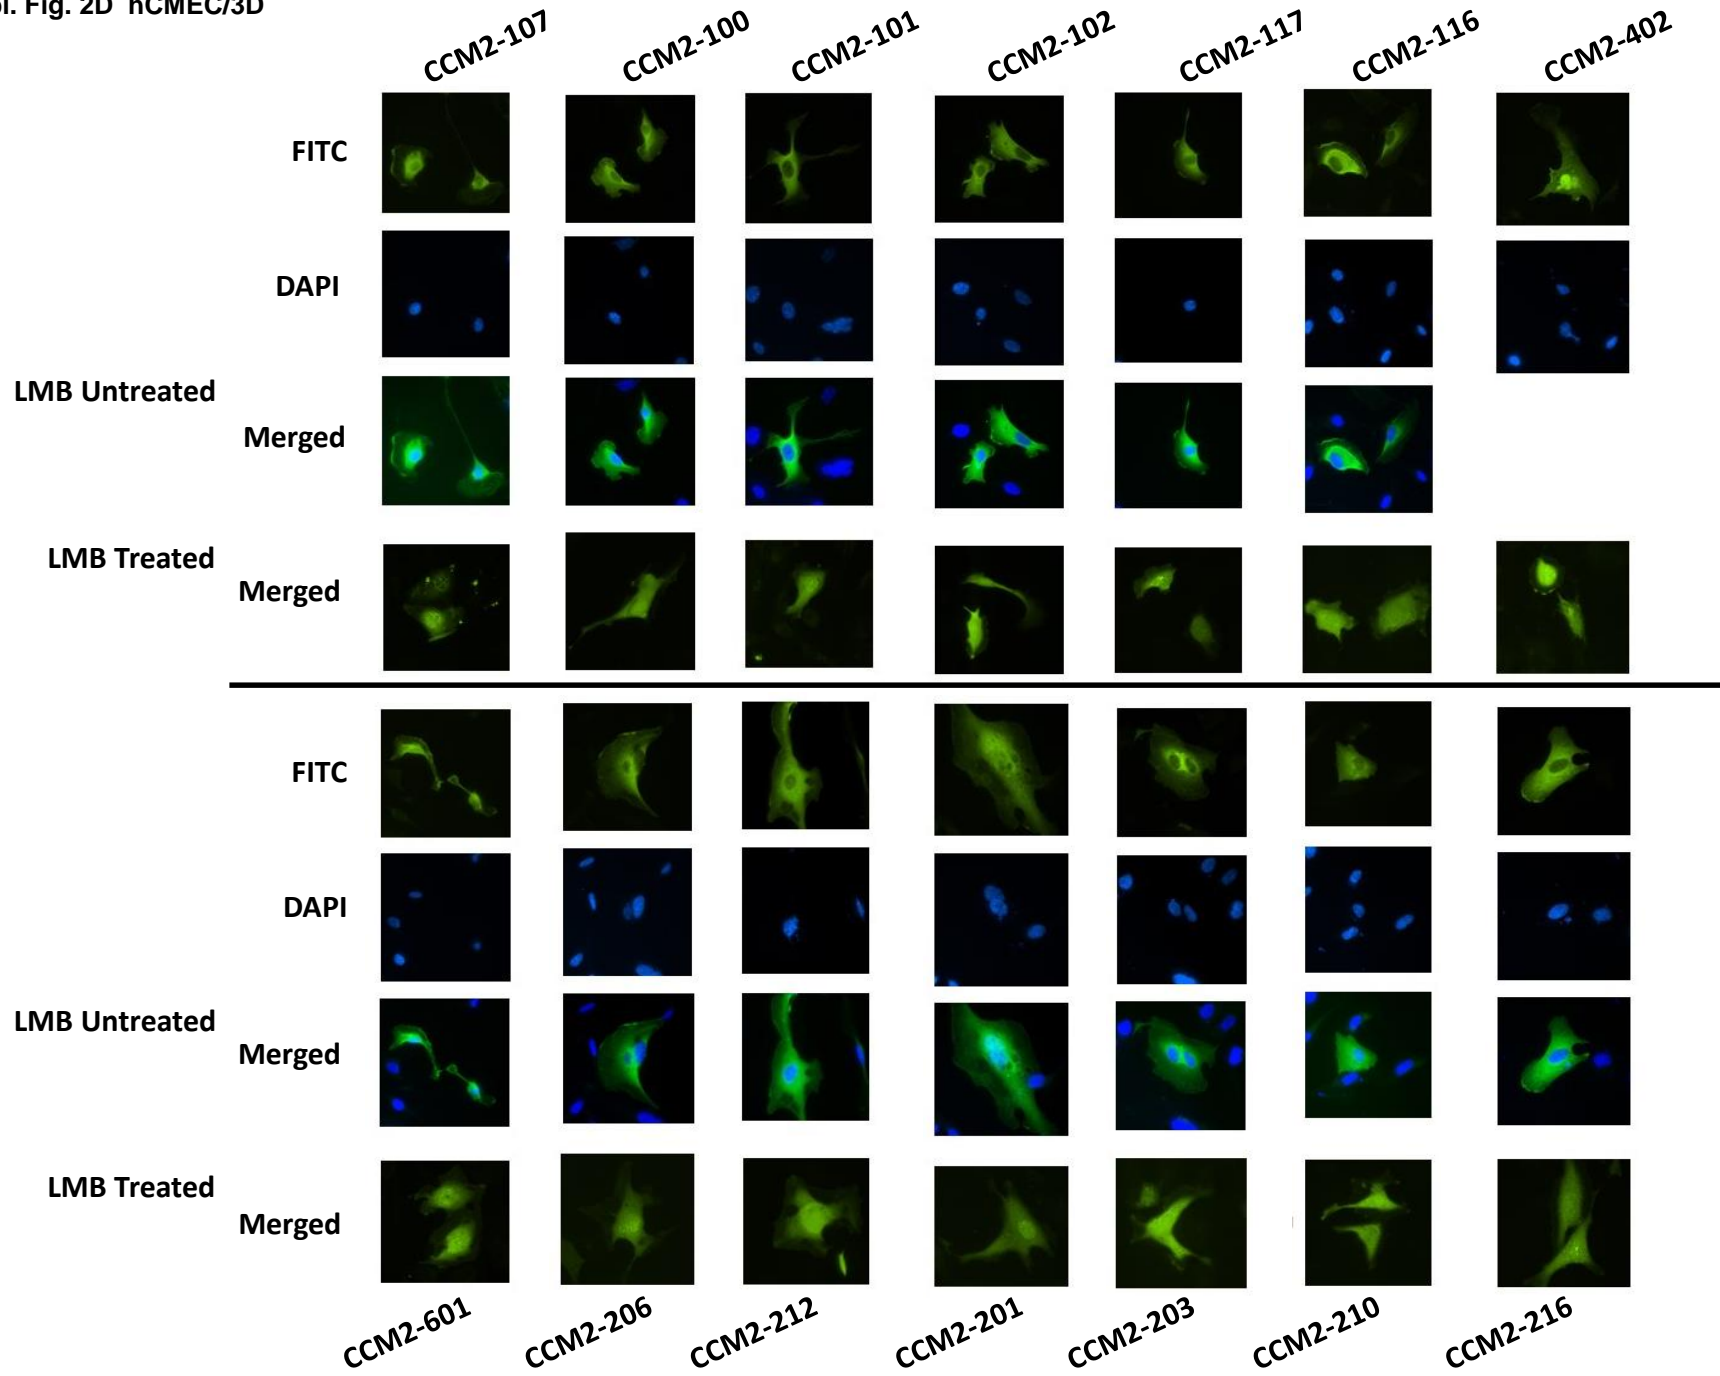

3B1

Figure 3B

2 for 293 cells

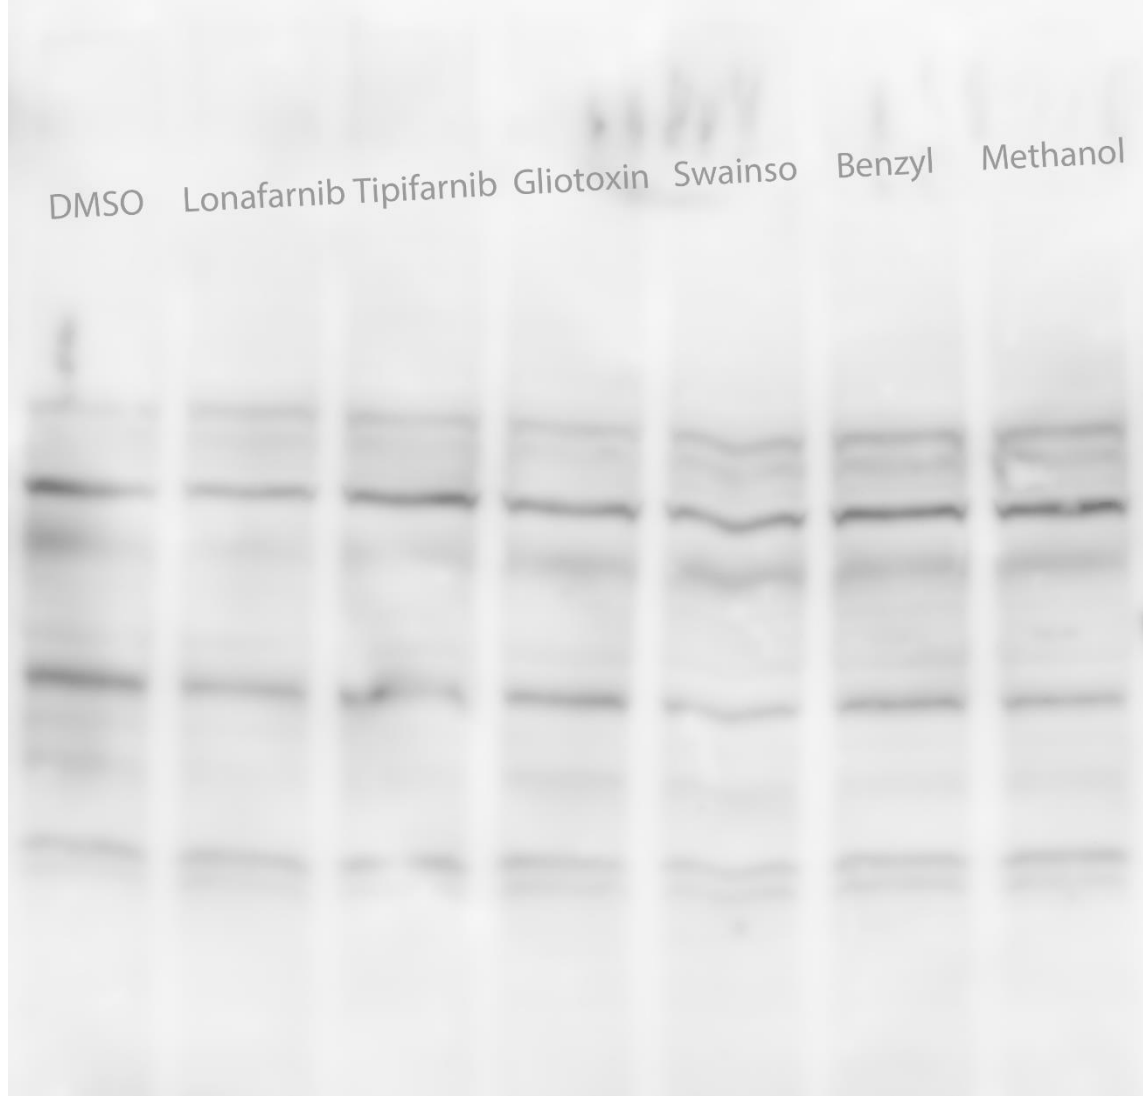



3B2

# Fig.3B. Actinin control

for 293 cells

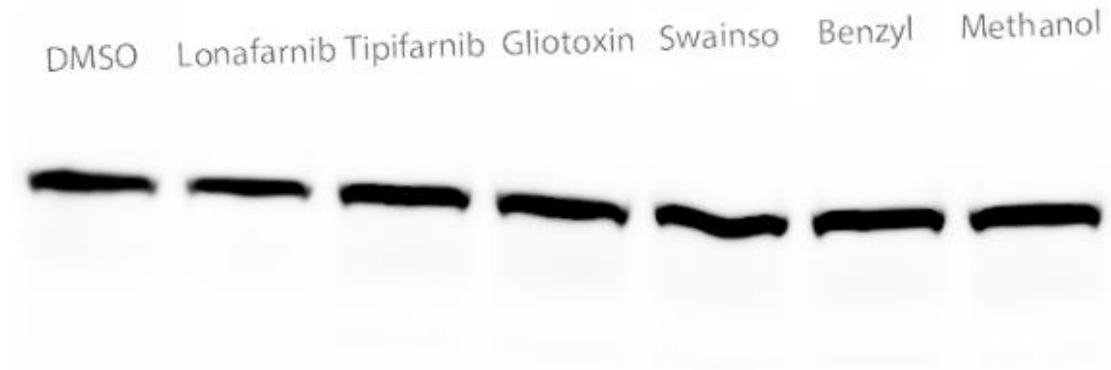

CCM2 RNAi- 293T

CCM2 SC SC SC CCM2

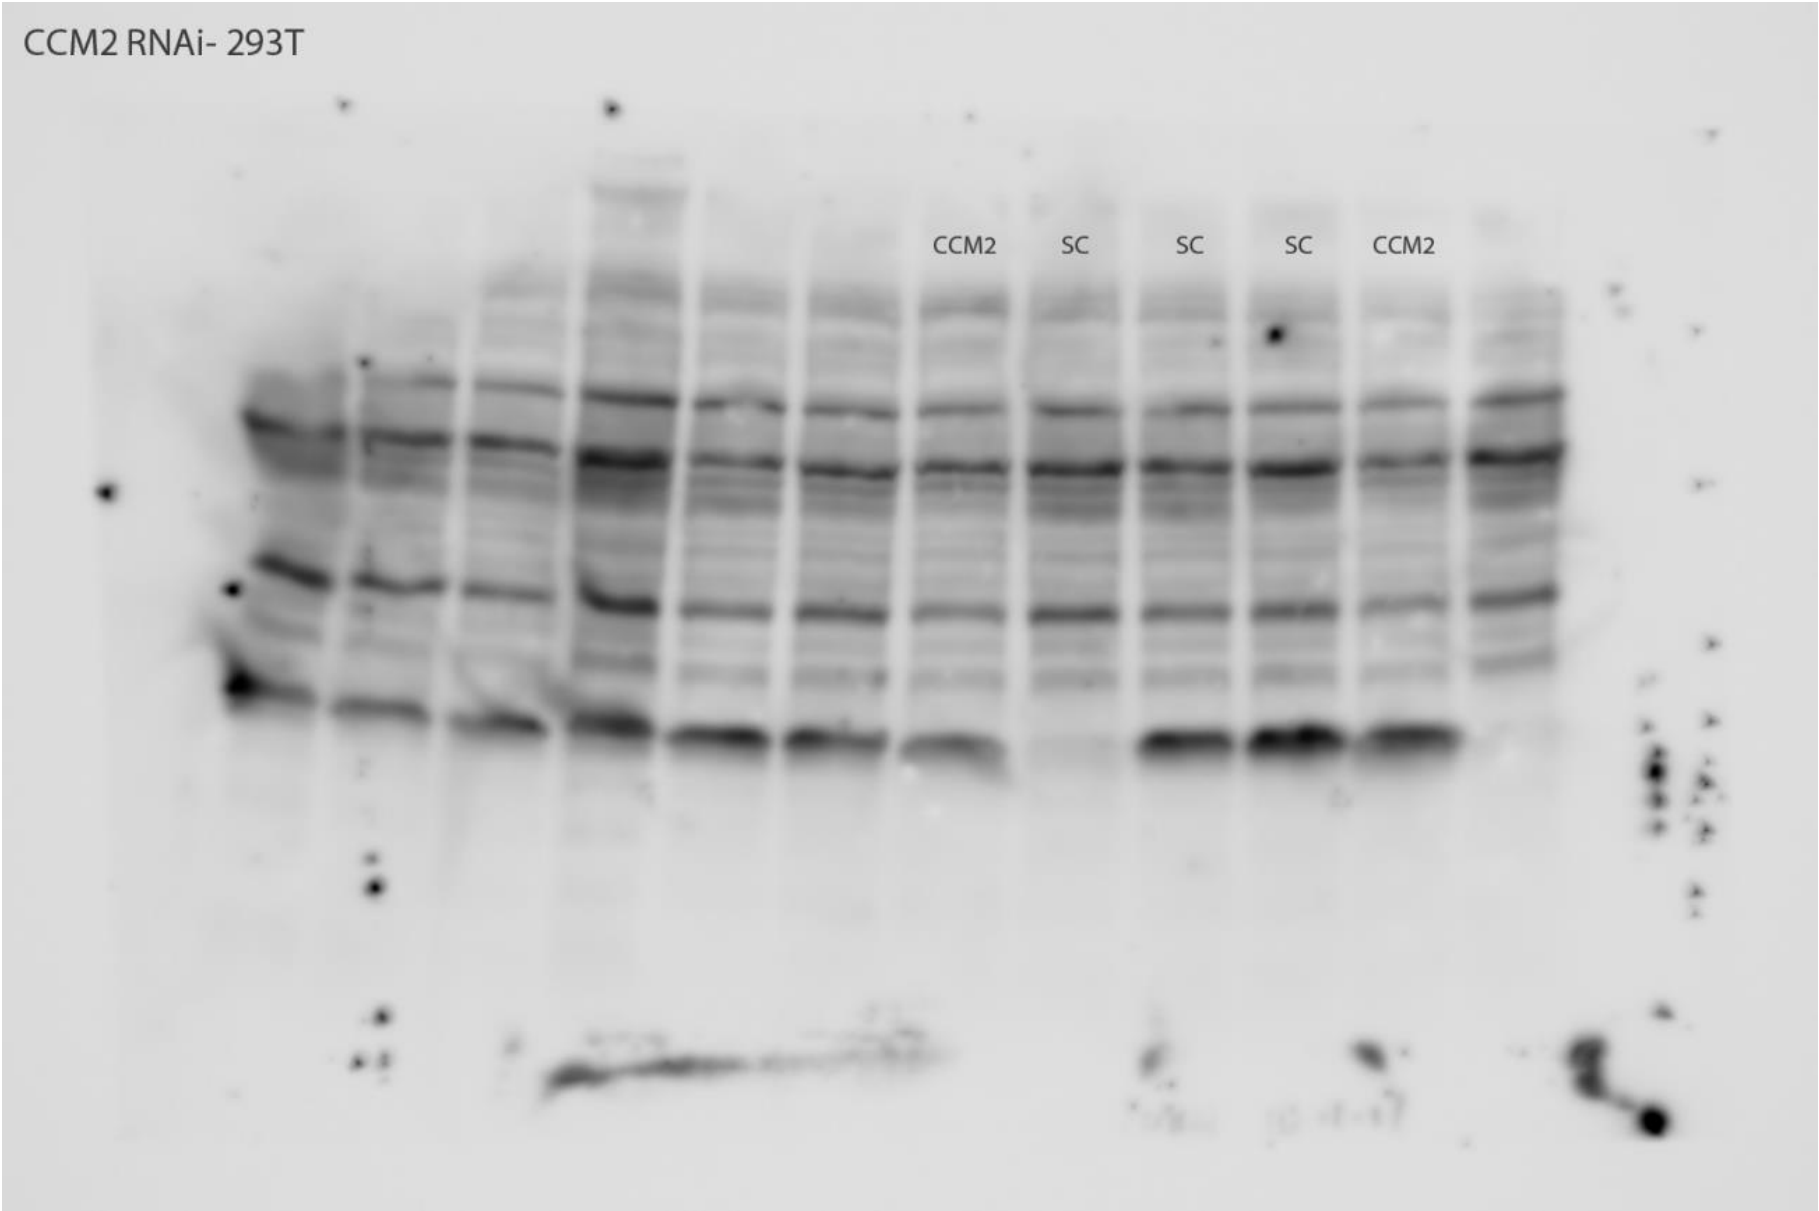

3C2

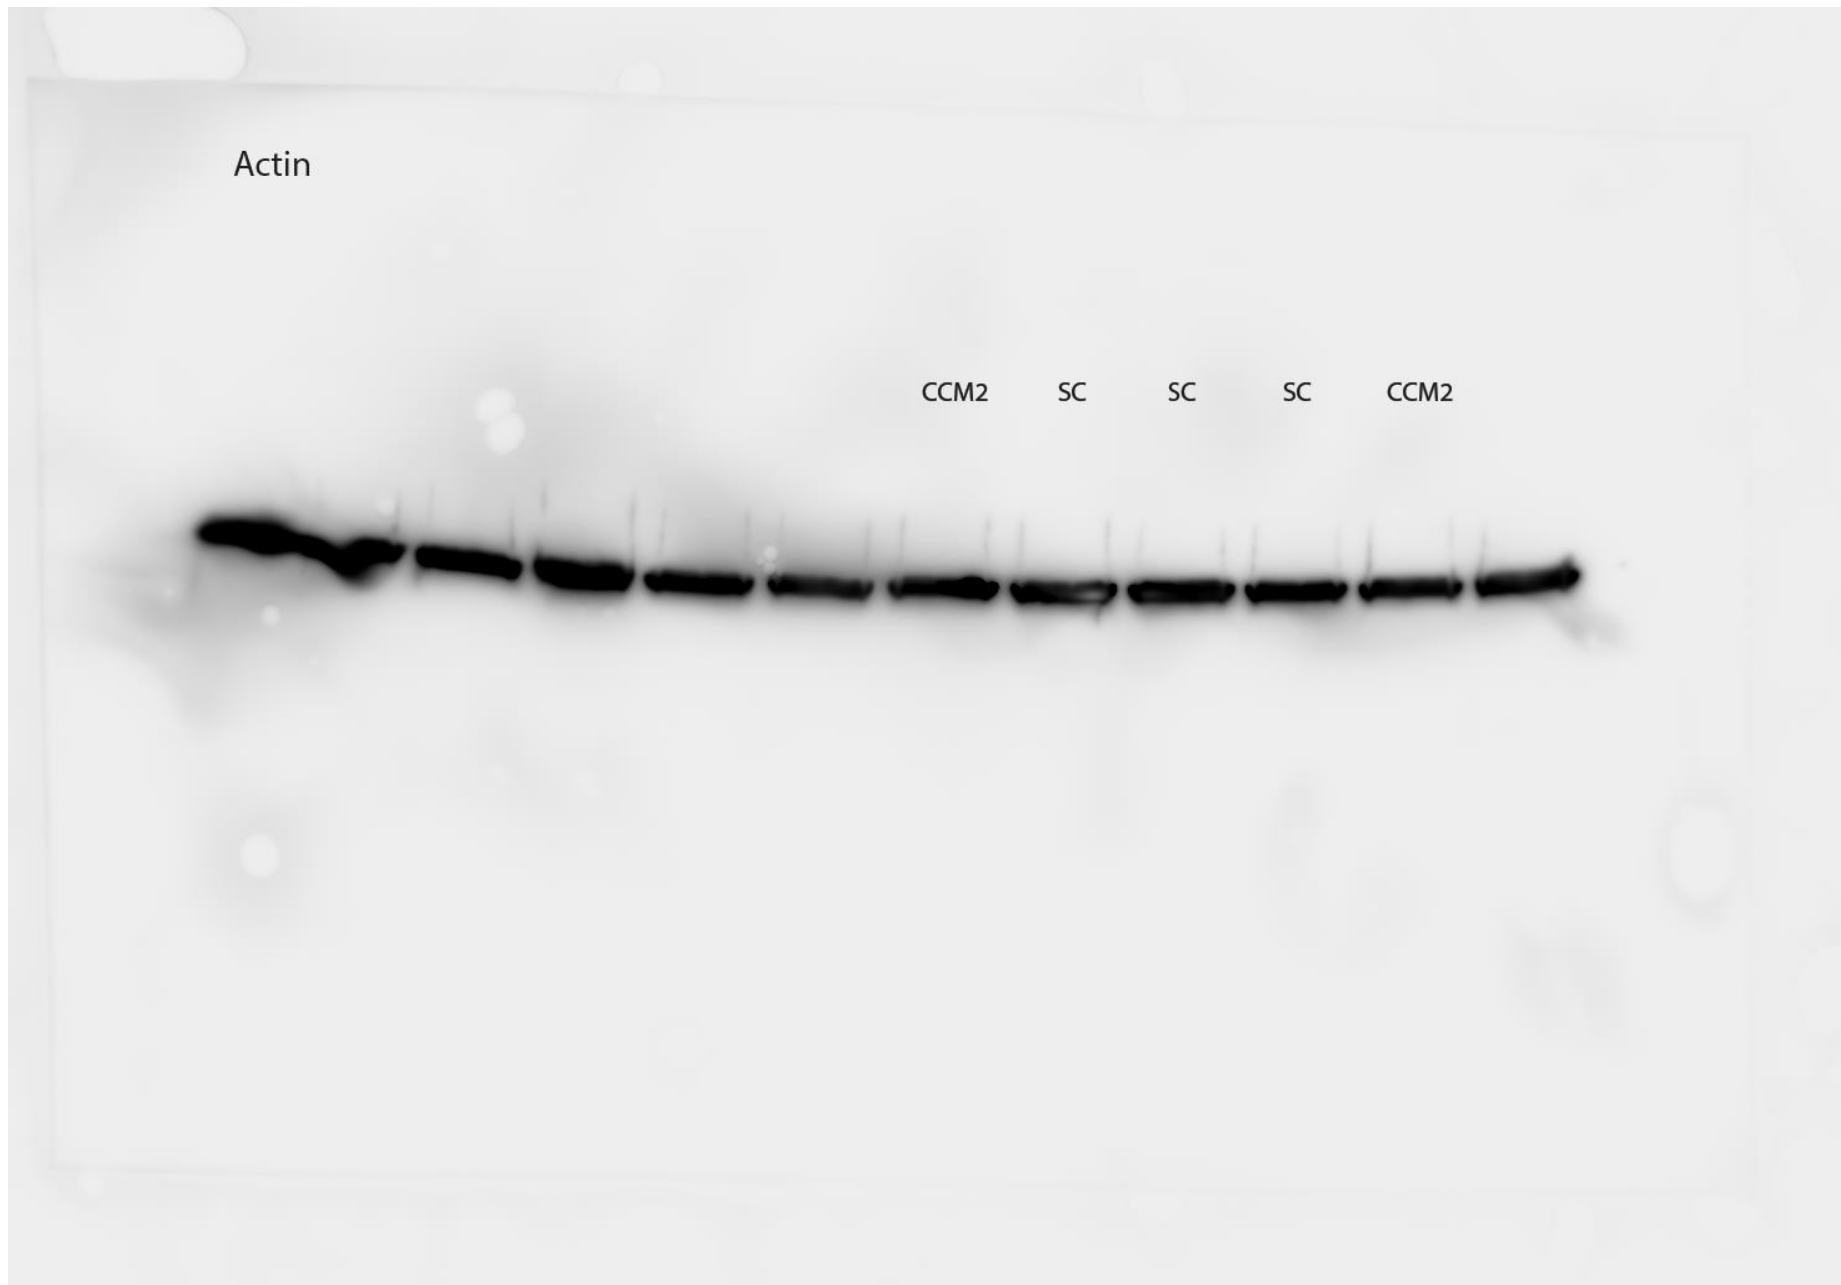

6A

Pre-IP

CCM2-201  
CCM2-203  
CCM2-206  
CCM2-210  
CCM2-102  
CCM2-106  
CCM2-107  
CCM2-116  
CCM2-117  
CCM2-600  
CCM2-101

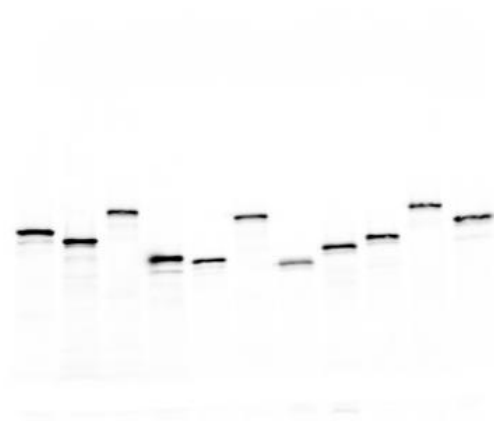

ITGB1A      ITGB2      ITGB4      ITGB6      MOCK  
ITGB1D      ITGB3      ITGB5      ITGB7

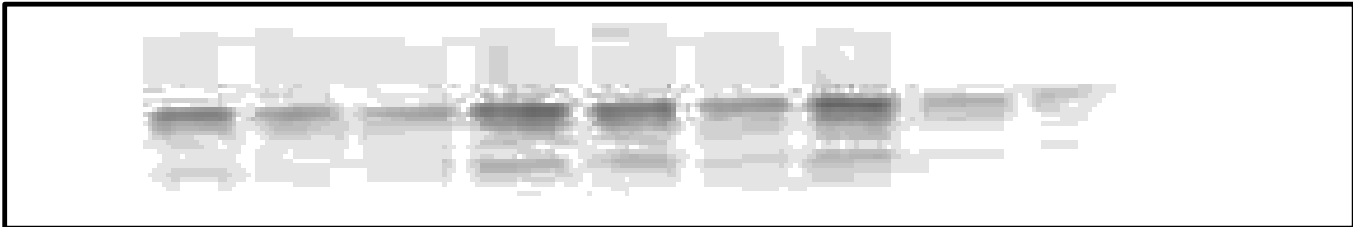

CCM3-107

ITGB1A      ITGB2      ITGB4      ITGB6      MOCK  
ITGB1D      ITGB3      ITGB5      ITGB7

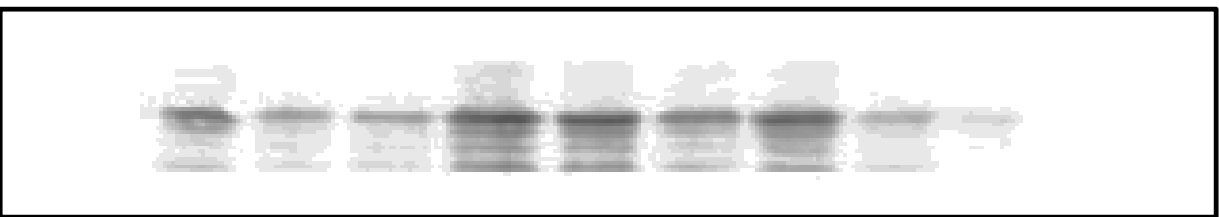

CCM2-116

ITGB1A ITGB2 ITGB4 ITGB6 MOCK  
TGB1D ITGB3 ITGB5 ITGB7

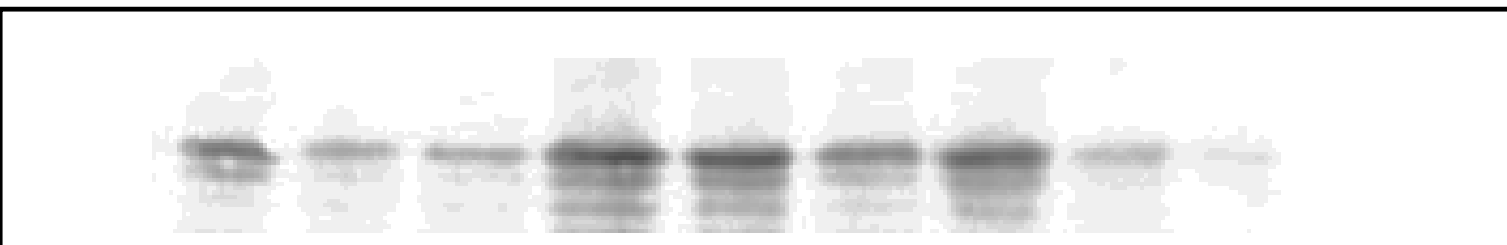

CCM2-201

ITGB1A ITGB2 ITGB4 ITGB6 MOCK  
ITGB1D ITGB3 ITGB5 ITGB7

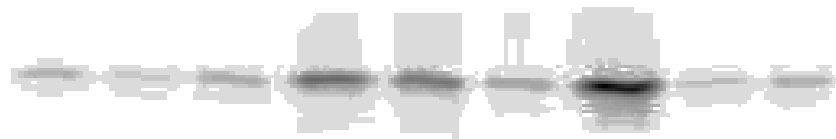

CCM2-212



# Loading control

6B1

PTB Exon6 Exon6A Exon6B 1209

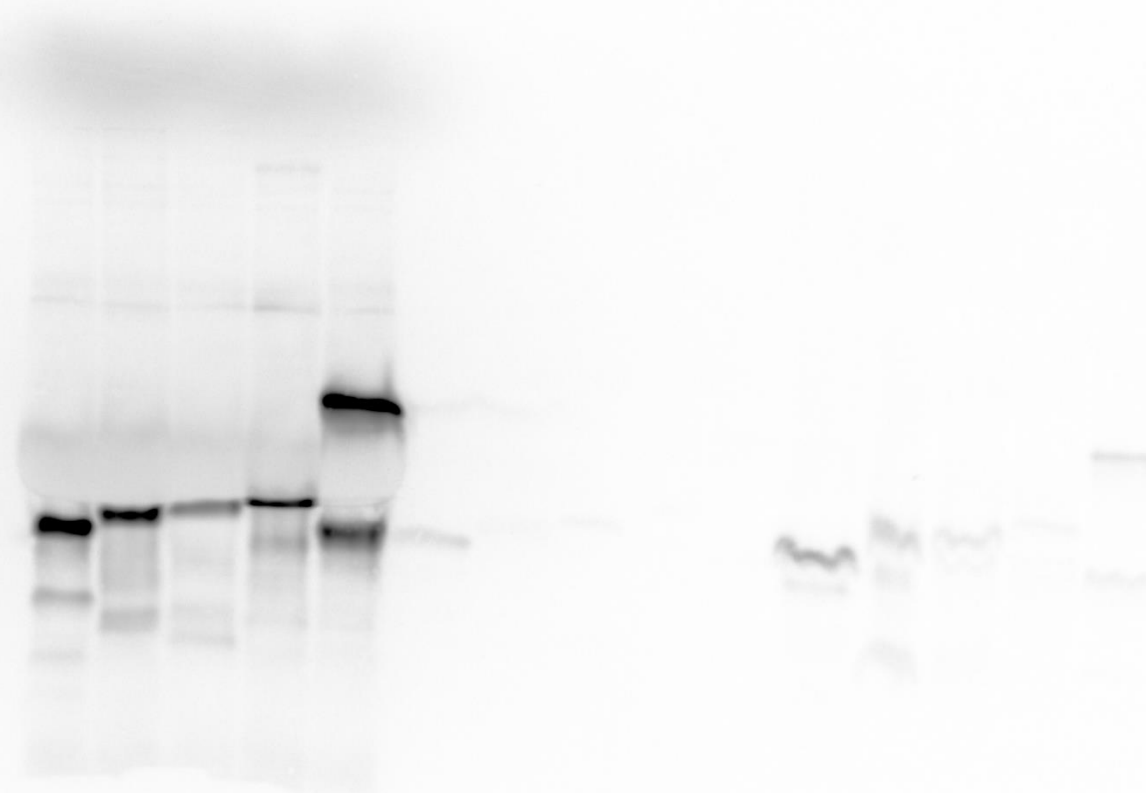

PTB Ex6 Ex6A Ex6B 1209

PTB Ex6 Ex6A Ex6B 1209

PTB Ex6 Ex6A Ex6B 1209

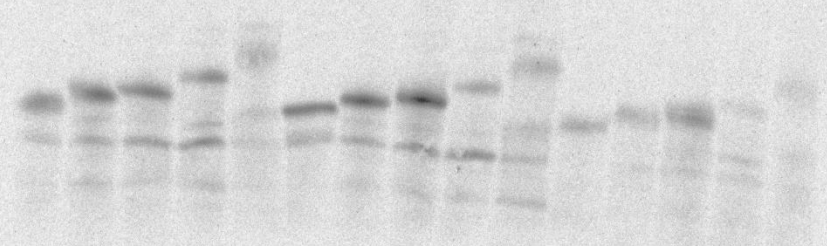

ITGB6

K2

PTB Ex6 Ex6A Ex6B 1209

PTB Ex6 Ex6A Ex6B 1209

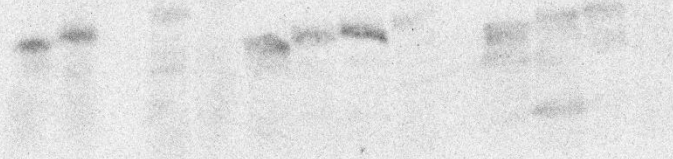

ITGB7

PTB Ex6 Ex6A Ex6B 1209

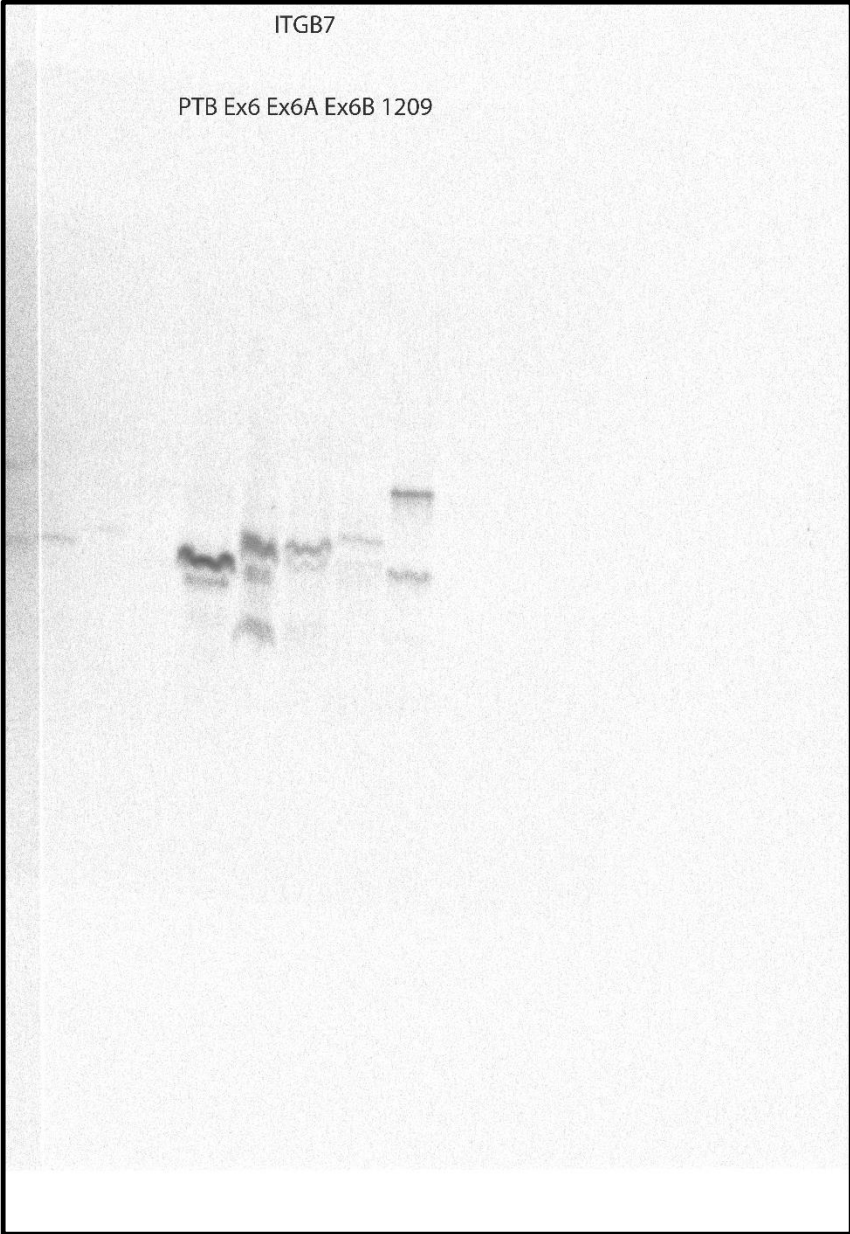

PTB

PTB

K5 ITGB2 ITGB3 Mock

**K5 ITGB2 ITGB3 Mock**

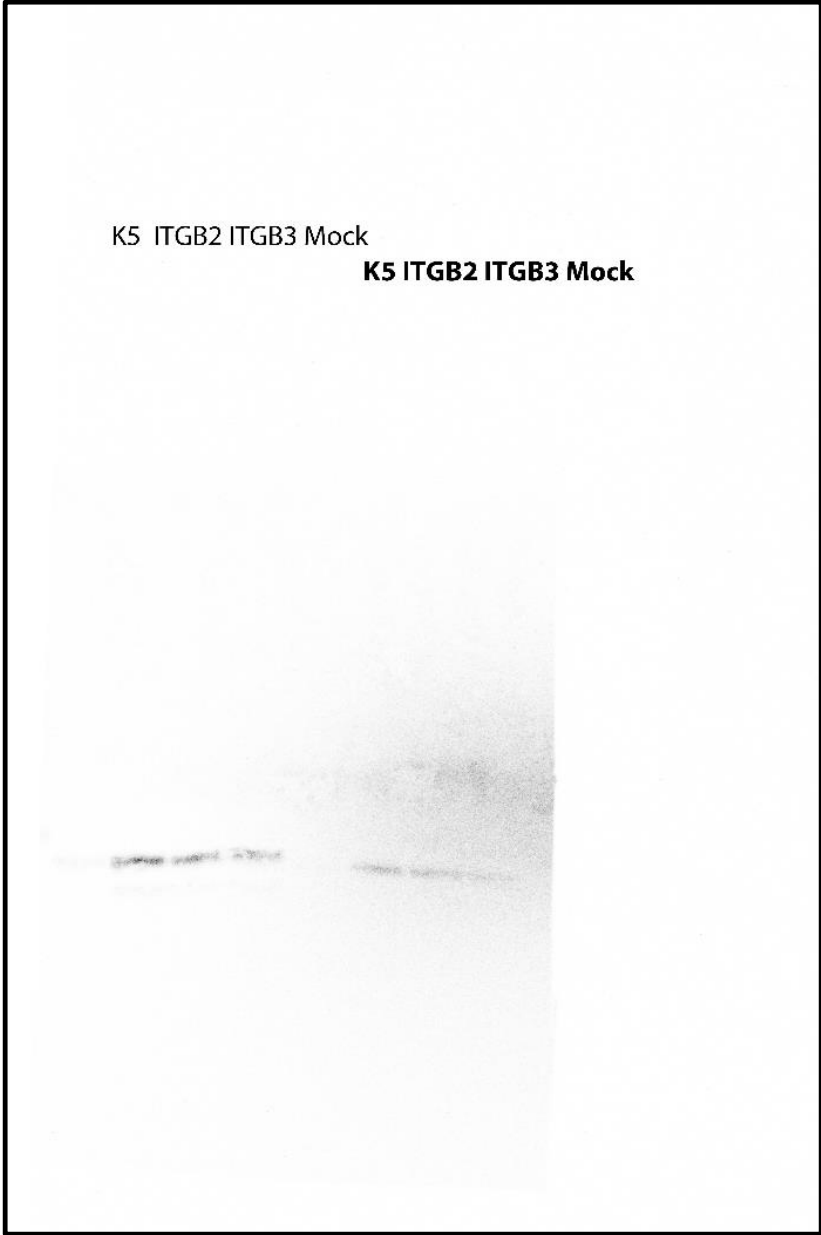

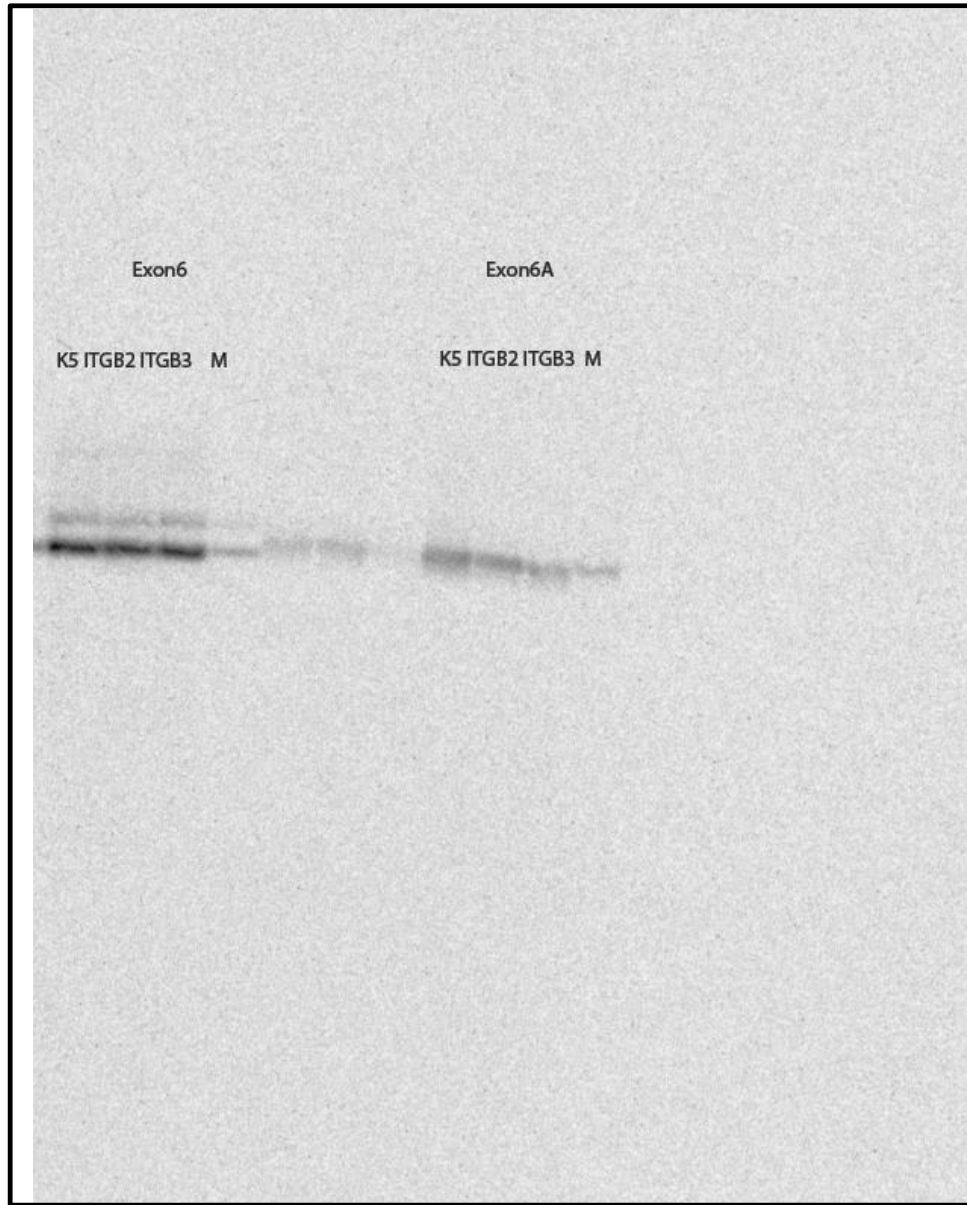

Supplement: 41598_2019_52386_MOESM1_ESM.pdf [file 41598_2019_52386_MOESM1_ESM.pdf]
